# Supplementary material for: Comprehensive enhancer-target gene assignments improve gene set level interpretation of genome-wide regulatory data
Source: PubMed Central journal article supplement (PMC9044877; doi:10.1186/s13059-022-02668-0), 2022-04-26

Fig S1

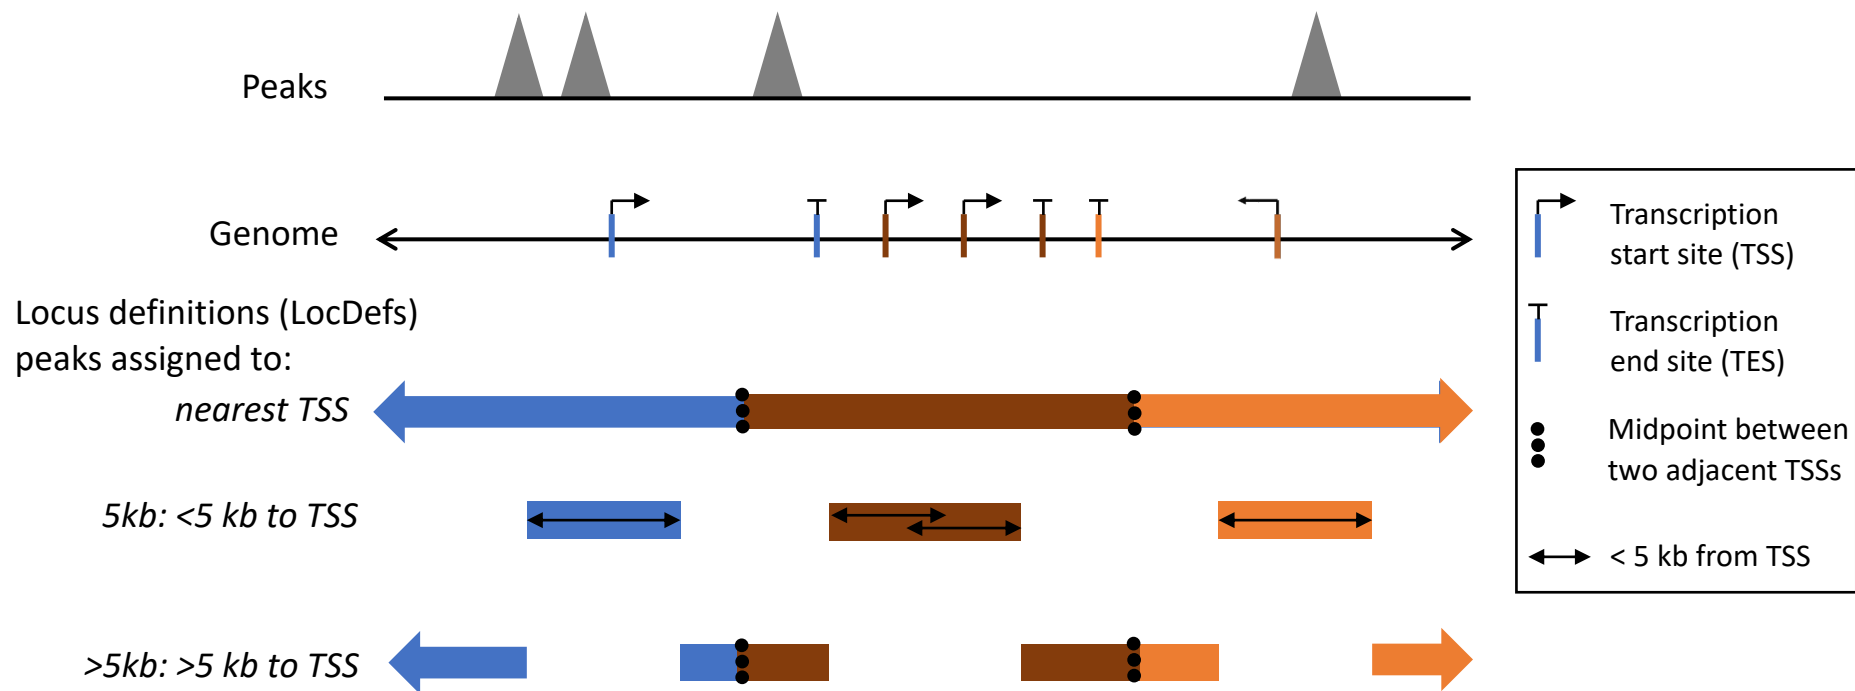

## Validation of top 10 enhancer ldefs on new cell lines

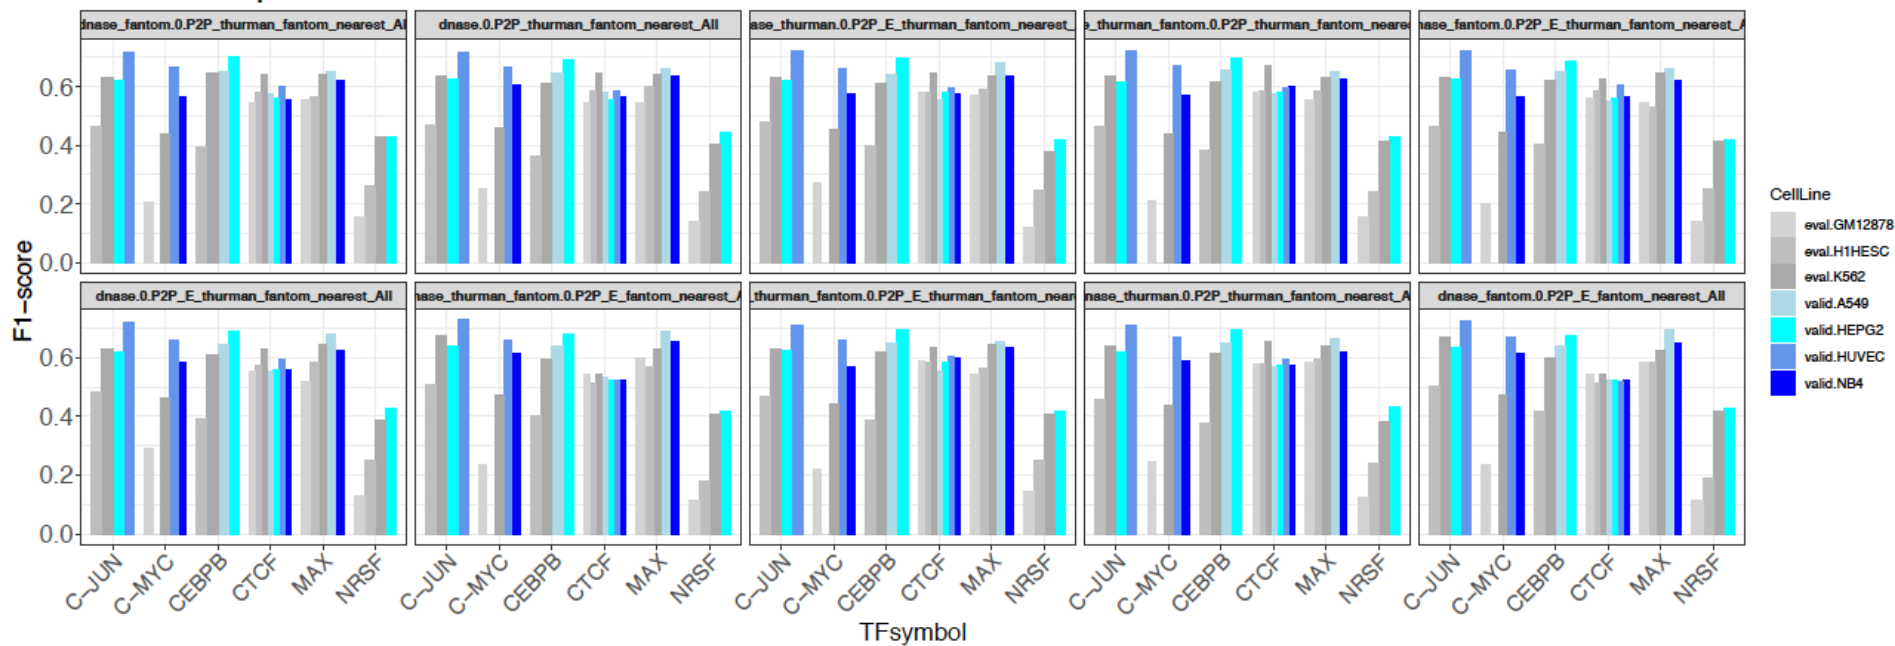

(A)

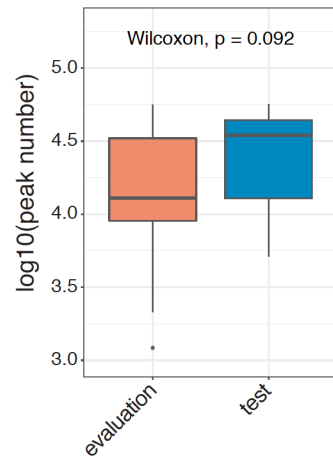

(B)

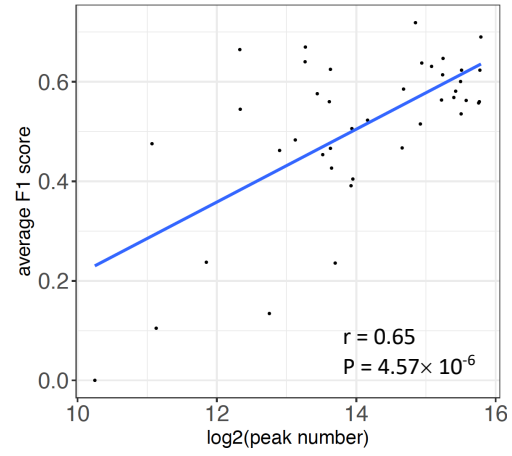

(C)

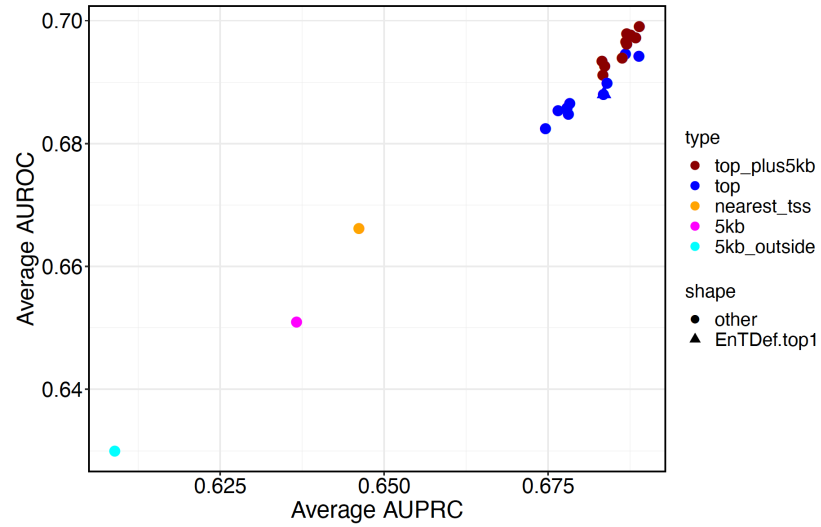

(A)

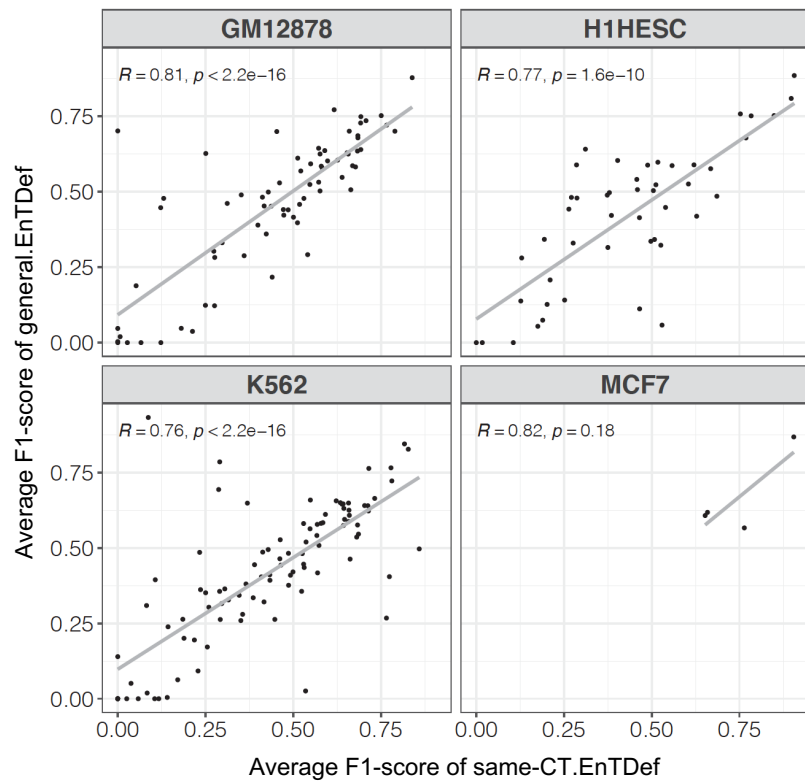

(B)

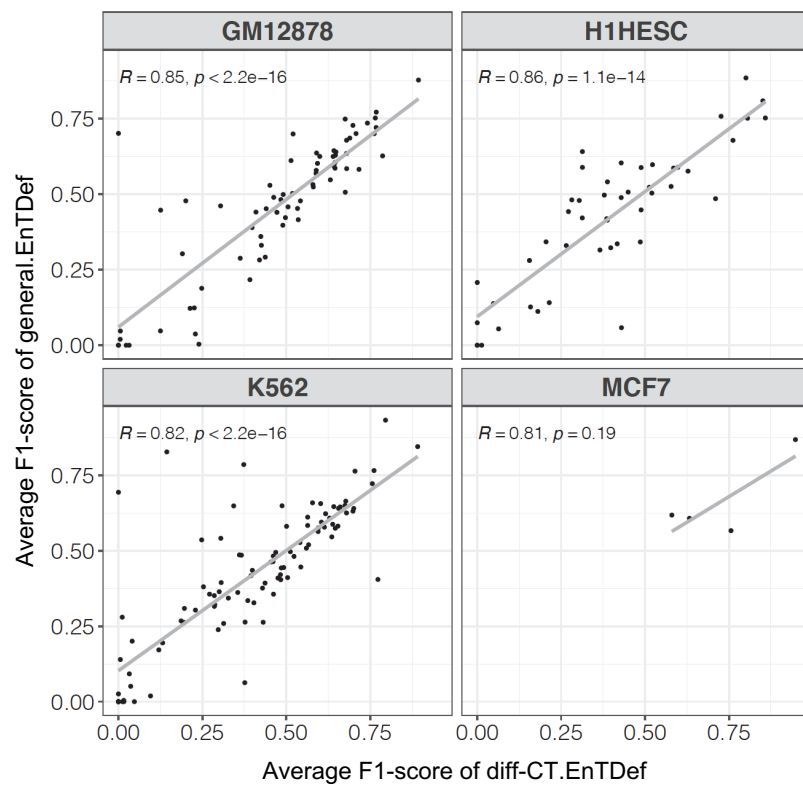

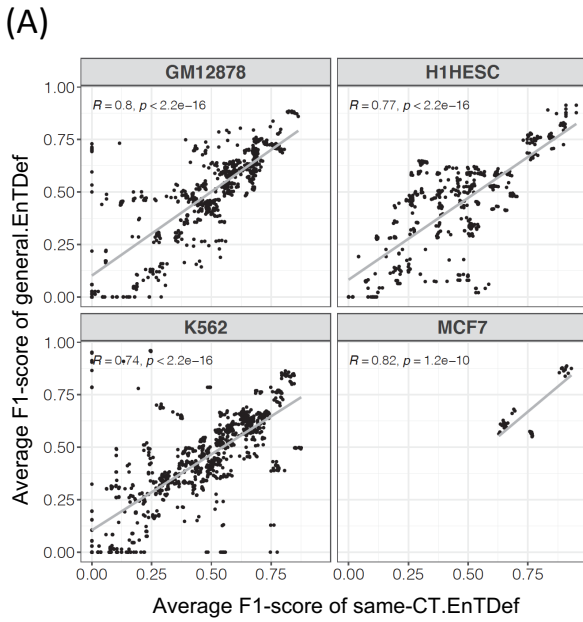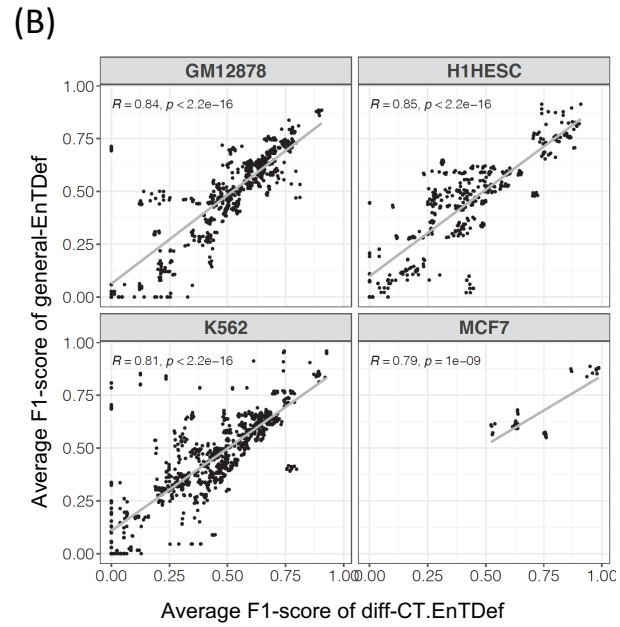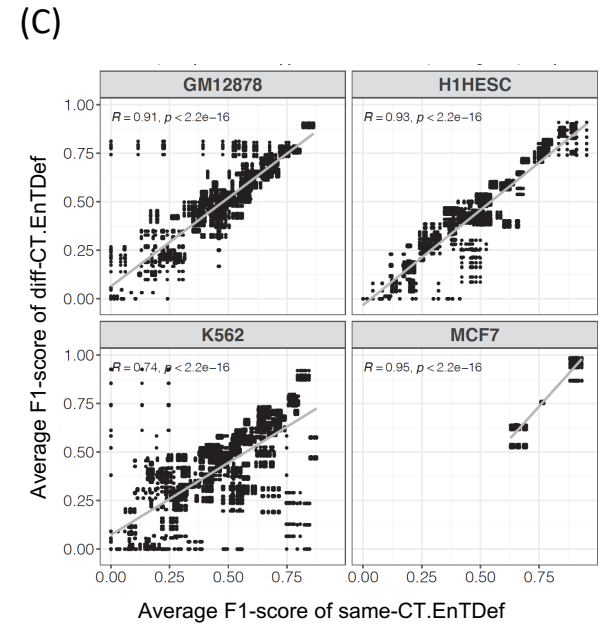

(A)

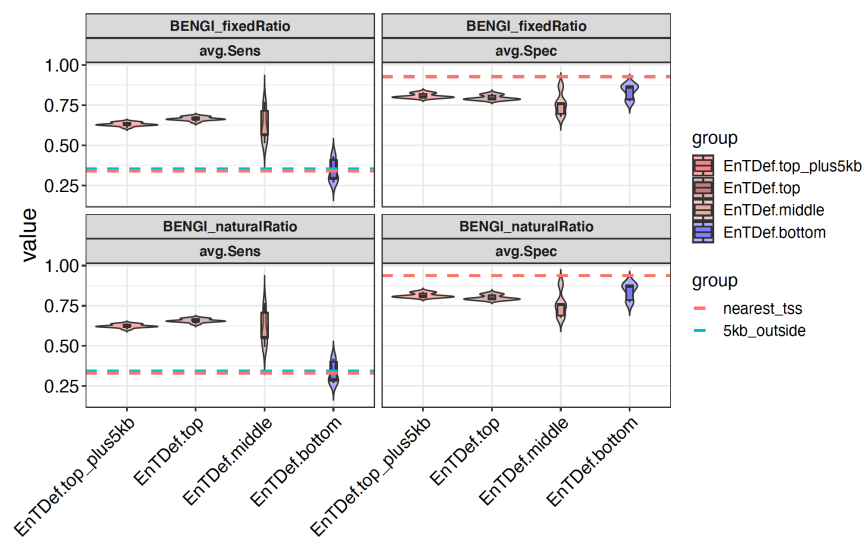

(B)

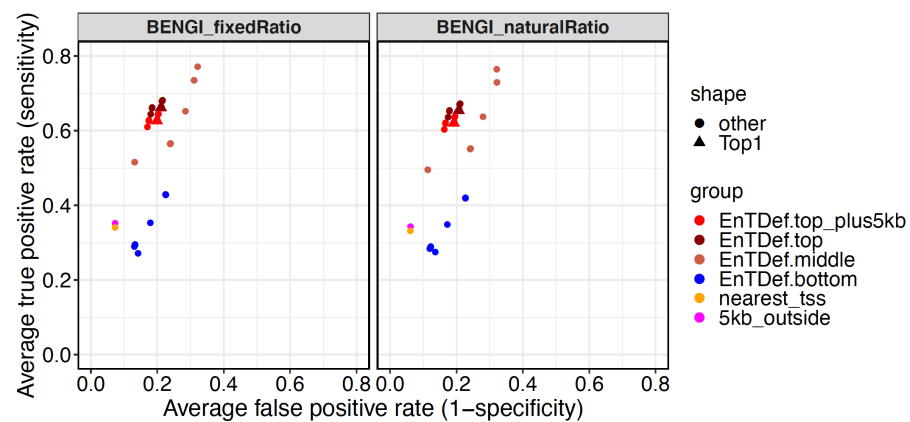

(A)

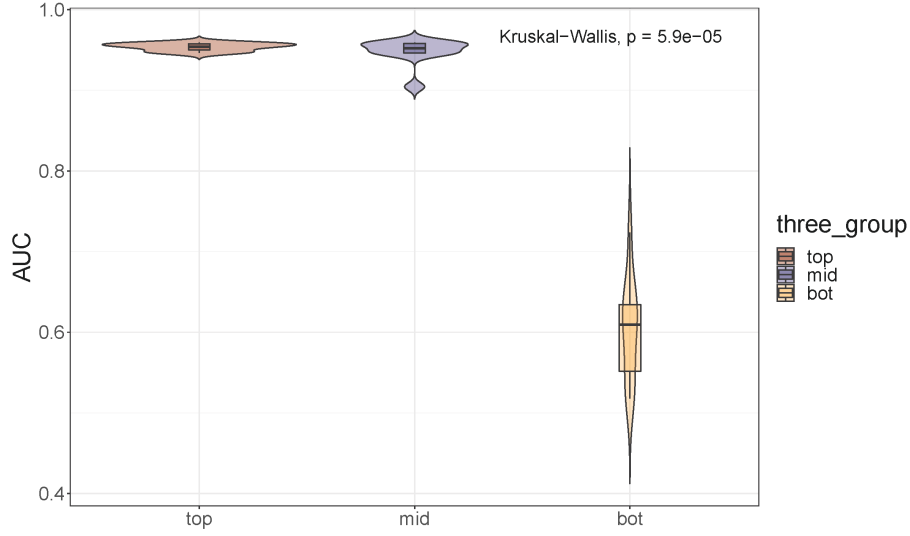

(B)

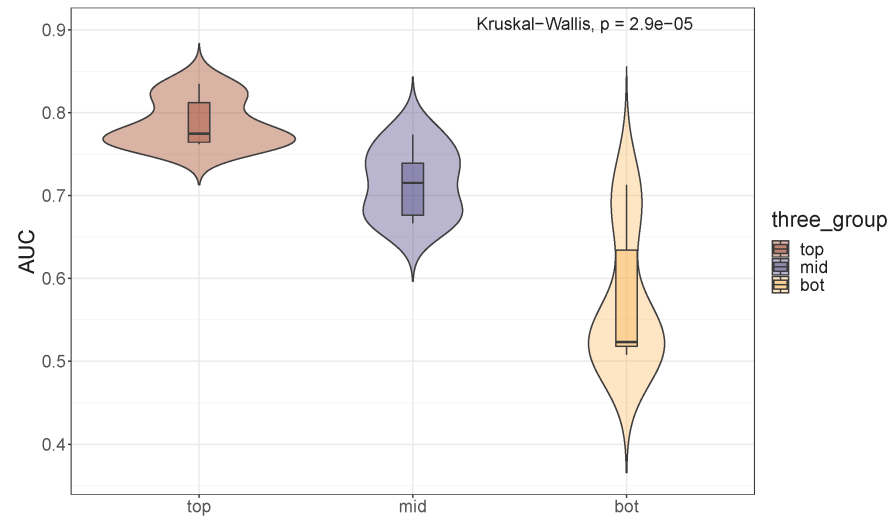

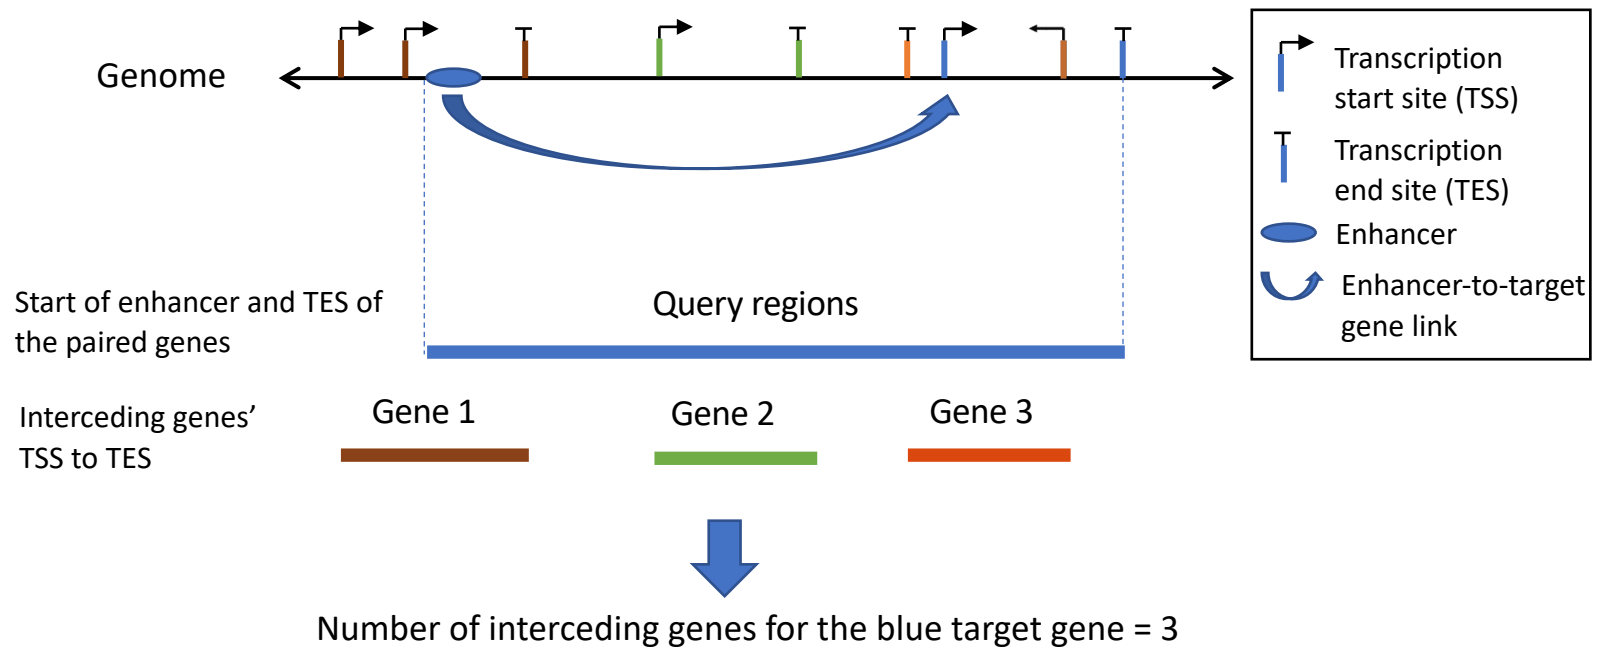



(A)

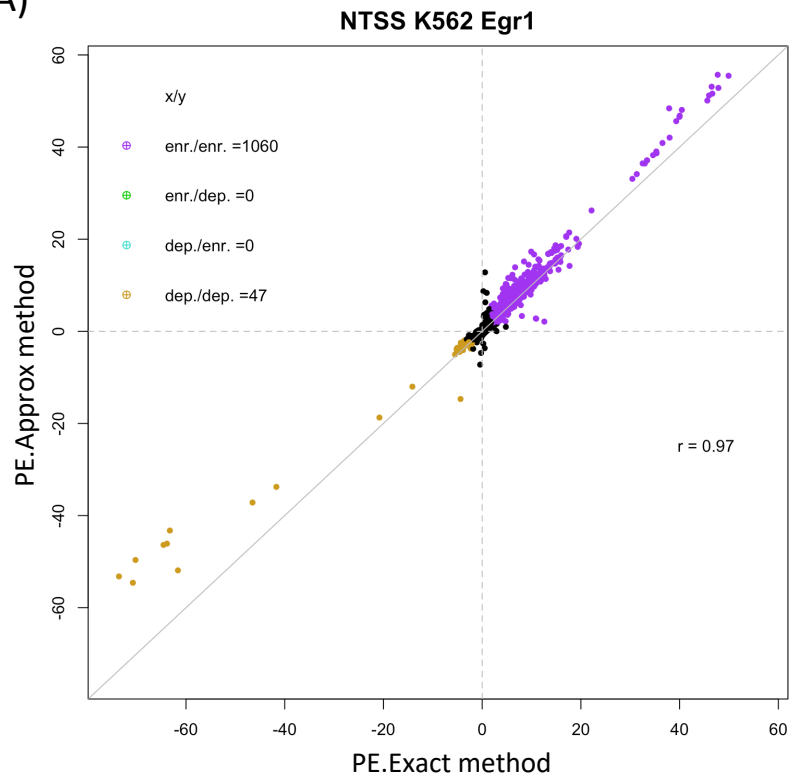

(B)

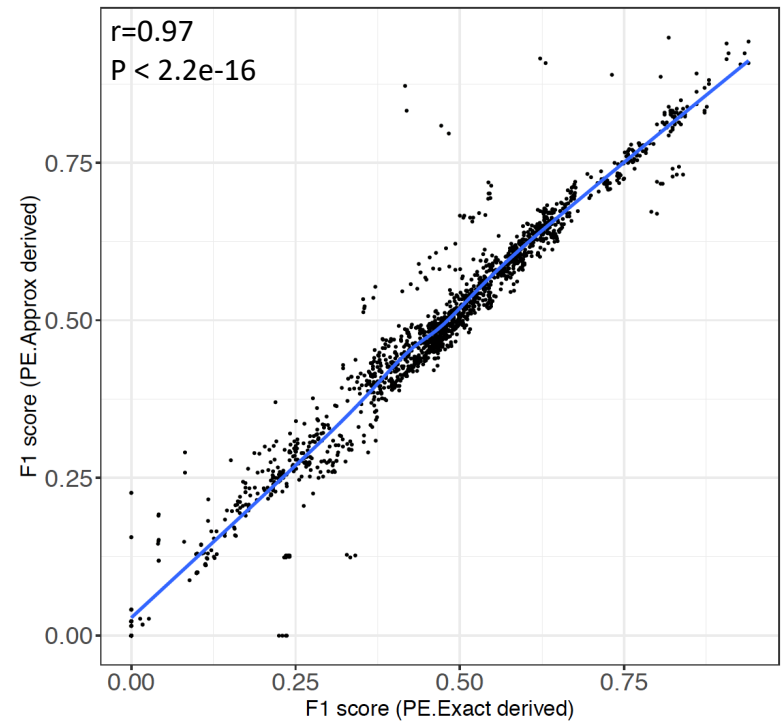

(A)

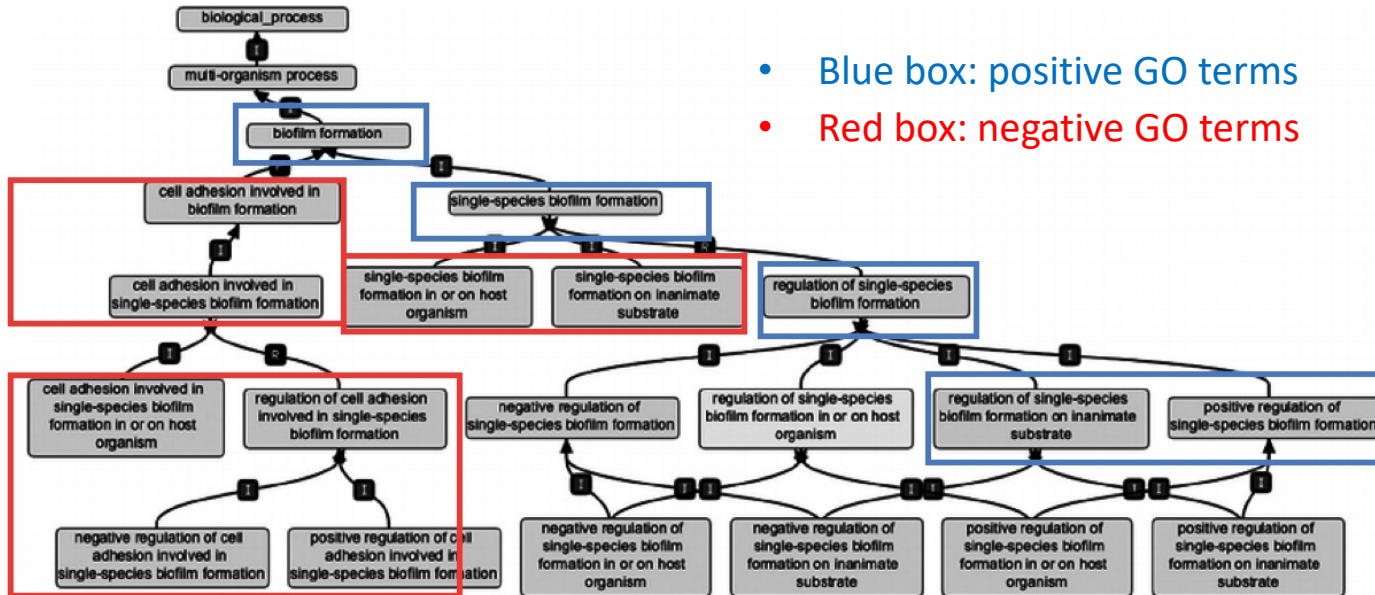

(B)

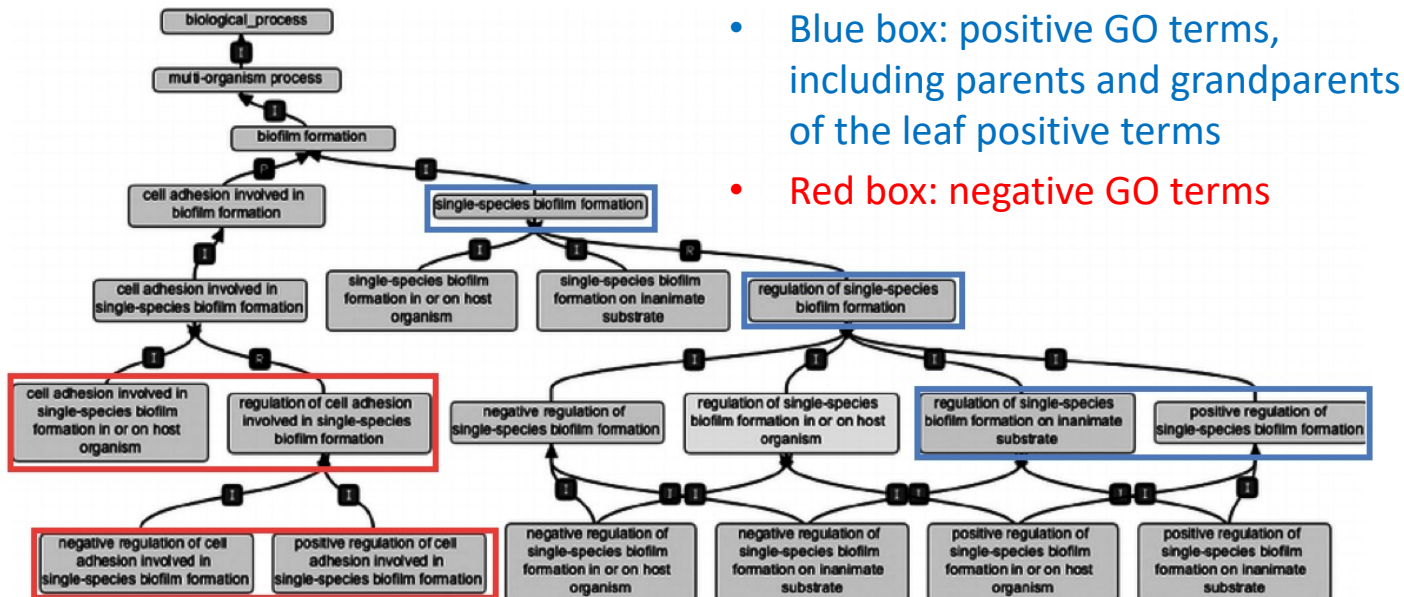

Supplement: 13059_2022_2668_MOESM1_ESM.pdf [file 13059_2022_2668_MOESM1_ESM.pdf]
